# Supplementary material
Source: publisher site journal article supplement (https://www.dovepress.com/article/500368)
Supplement: Supplementary file 1 [file get_supplementary_file.php]

**Supplementary Table 1** Mean of visual acuity in each visit between the two groups of an initial VA 20/200.

| Visit | BCVA groups | Mean | SD |
| --- | --- | --- | --- |
| Initial | <20/200 | 0.57 | 0.20 |
|  | ≥20/200 | 1.80 | 0.79 |
| 1 week | <20/200 | 0.55 | 0.28 |
|  | ≥20/200 | 1.76 | 0.84 |
| 4 weeks | <20/200 | 0.56 | 0.44 |
|  | ≥20/200 | 1.75 | 0.91 |
| 12 weeks | <20/200 | 0.49 | 0.44 |
|  | ≥20/200 | 1.86 | 0.93 |

Notes: SD, standard deviation; BCVA, best-corrected visual acuity.

**Supplementary Table 2** Mean of visual acuity in each visit between the two groups of VA improvement.

| Visit | Improvement groups | Mean | SD |
| --- | --- | --- | --- |
| Initial | Non-improvement | 1.26 | 0.90 |
|  | Improvement | 1.01 | 0.68 |
| 1 week | Non-improvement | 1.29 | 0.92 |
|  | Improvement | 0.87 | 0.68 |
| 4 weeks | Non-improvement | 1.34 | 0.98 |
|  | Improvement | 0.75 | 0.66 |
| 12 weeks | Non-improvement | 1.40 | 1.05 |
|  | Improvement | 0.70 | 0.68 |

Note: SD, standard deviation.
